# Supplementary material
Source: publisher figshare collection journal article supplement (https://acs.figshare.com/ndownloader/files/4173424)
Supplement: Supplementary file 1 [file 4173424]

## Supplemental Data for

# Unfolding Action of Alcohols on a Highly Negatively Charged State of Cytochrome *c*

Pulikallu Sashi, U. Mahammad Yasin, and Abani K. Bhuyan\*

School of Chemistry, University of Hyderabad, Hyderabad 500 046, India

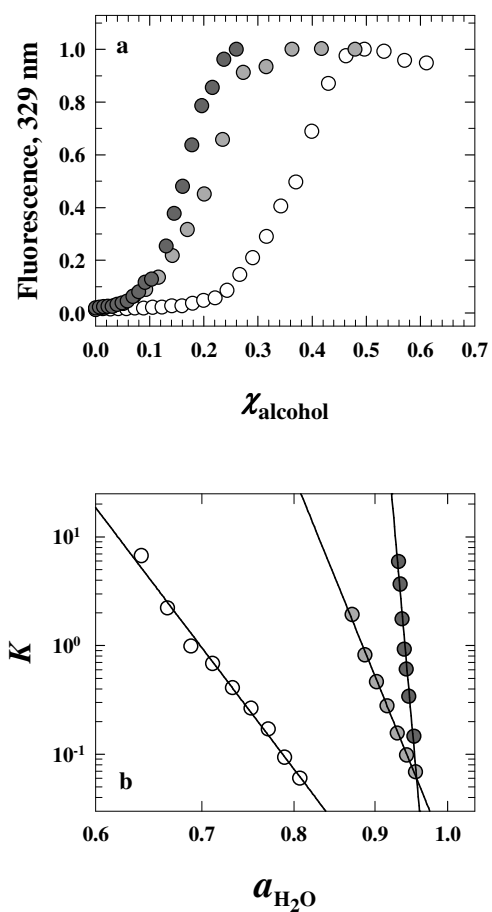

Unfolding of cytochrome *c* at pH 7, 50 mM HEPES, 24°C, by methanol (○), ethanol (●), and propanol (●). (a) Normalized fluorescence intensities are plotted as a function of mole fraction of alcohol. The unfolding equilibrium at pH 7 appears to be two-state. (b) Plots used to quantify the preferential hydration parameter across the folding-unfolding equilibrium. The water exclusion values are listed in Table 1 of the main text.
